# Supplementary material
Source: MDPI journal article supplement (https://www.mdpi.com/2218-2004/9/4/88)
Supplement: s1 [file s1]

# Supplemental Materials: Response Functions

Patrick Kelly and Ettore Vitali \*

Department of Physics, California State University Fresno, Fresno, CA 93740, USA;

ptfk121493@mail.fresnostate.edu

\* Correspondence: evitali@csufresno.edu

## 1. BCS Response Functions

Here we give the explicit expressions for all the BCS response functions (the matrix elements in equation (12) in the main text) used in our study. Below,  $u(\mathbf{k})$  and  $v(\mathbf{k})$  are the coefficients of the BCS wave function:

$$|\Psi_{BCS}\rangle = \prod_{\mathbf{k}} \left( u(\mathbf{k}) + v(\mathbf{k}) \hat{c}_{\mathbf{k},\uparrow}^{\dagger} \hat{c}_{-\mathbf{k},\downarrow}^{\dagger} \right) |0\rangle \quad (\text{S1})$$

and are given by:

$$u^2(\mathbf{k}) = \frac{1}{2} \left( 1 + \frac{\xi(\mathbf{k})}{\sqrt{\xi(\mathbf{k})^2 + \Delta_{BCS}^2}} \right), \quad v^2(\mathbf{k}) = \frac{1}{2} \left( 1 - \frac{\xi(\mathbf{k})}{\sqrt{\xi(\mathbf{k})^2 + \Delta_{BCS}^2}} \right) \quad (\text{S2})$$

In the above:

$$\xi(\mathbf{k}) = \varepsilon(\mathbf{k}) - \mu_{BCS} \quad (\text{S3})$$

We also define:

$$E(\mathbf{k}) = \sqrt{\xi(\mathbf{k})^2 + \Delta_{BCS}^2} \quad (\text{S4})$$

The GRPA calculation needs to be preceded by a standard BCS calculation to find  $\mu_{BCS}$  and  $\Delta_{BCS}$ .

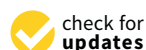

**Citation:** Kelly, P.; Vitali, E.  
Supplemental Materials: Response  
Functions. *Atoms* **2021**, *9*, 88.  
<https://doi.org/10.3390/atoms9040088>

Academic Editor: Nicola Piovella

Received: 13 September 2021

Accepted: 23 October 2021

Published: 26 October 2021

**Publisher's Note:** MDPI stays neutral with regard to jurisdictional claims in published maps and institutional affiliations.

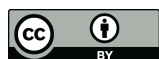

**Copyright:** © 2021 by the authors. Licensee MDPI, Basel, Switzerland. This article is an open access article distributed under the terms and conditions of the Creative Commons Attribution (CC BY) license (<https://creativecommons.org/licenses/by/4.0/>).

$$\chi_{11}^0(\mathbf{K}, \omega) = \frac{1}{V} \sum_{\mathbf{k}} \left( \frac{v^*(\mathbf{k}) u(\mathbf{k} - \mathbf{K}) v(\mathbf{k}) u^*(\mathbf{k} - \mathbf{K})}{\omega + E(\mathbf{k} - \mathbf{K}) + E(-\mathbf{k}) + i0^+} - \frac{u(\mathbf{k} + \mathbf{K}) v^*(\mathbf{k}) u^*(\mathbf{k} + \mathbf{K}) v(\mathbf{k})}{\omega - E(\mathbf{k} + \mathbf{K}) - E(-\mathbf{k}) + i0^+} \right) \quad (\text{S5})$$

$$\chi_{12}^0(\mathbf{K}, \omega) = \frac{1}{V} \sum_{\mathbf{k}} \left( \frac{v(\mathbf{k} - \mathbf{K}) u^*(\mathbf{k}) v(\mathbf{k}) u^*(\mathbf{k} - \mathbf{K})}{\omega + E(\mathbf{k} - \mathbf{K}) + E(-\mathbf{k}) + i0^+} - \frac{u(\mathbf{k} + \mathbf{K}) v^*(\mathbf{k}) u(\mathbf{k}) v^*(\mathbf{k} + \mathbf{K})}{\omega - E(\mathbf{k} + \mathbf{K}) - E(-\mathbf{k}) + i0^+} \right) \quad (\text{S6})$$

$$\chi_{13}^0(\mathbf{K}, \omega) = \frac{1}{V} \sum_{\mathbf{k}} \left( \frac{u^*(\mathbf{k}) u(\mathbf{k} - \mathbf{K}) v(\mathbf{k}) u^*(\mathbf{k} - \mathbf{K})}{\omega + E(\mathbf{k} - \mathbf{K}) + E(-\mathbf{k}) + i0^+} + \frac{u(\mathbf{k} + \mathbf{K}) v^*(\mathbf{k}) v^*(\mathbf{k} + \mathbf{K}) v(\mathbf{k})}{\omega - E(\mathbf{k} + \mathbf{K}) - E(-\mathbf{k}) + i0^+} \right) \quad (\text{S7})$$

$$\chi_{14}^0(\mathbf{K}, \omega) = \frac{1}{V} \sum_{\mathbf{k}} \left( \frac{-v^*(\mathbf{k}) v(\mathbf{k} - \mathbf{K}) v(\mathbf{k}) u^*(\mathbf{k} - \mathbf{K})}{\omega + E(\mathbf{k} - \mathbf{K}) + E(-\mathbf{k}) + i0^+} - \frac{u(\mathbf{k} + \mathbf{K}) v^*(\mathbf{k}) u^*(\mathbf{k}) u(\mathbf{k} + \mathbf{K})}{\omega - E(\mathbf{k} + \mathbf{K}) - E(-\mathbf{k}) + i0^+} \right) \quad (\text{S8})$$

$$\chi_{21}^0(\mathbf{K}, \omega) = \frac{1}{V} \sum_{\mathbf{k}} \left( \frac{v^*(\mathbf{k})u(\mathbf{k}-\mathbf{K})v^*(\mathbf{k}-\mathbf{K})u(\mathbf{k})}{\omega + E(\mathbf{k}-\mathbf{K}) + E(-\mathbf{k}) + i0^+} - \frac{u^*(\mathbf{k})v(\mathbf{k}+\mathbf{K})u^*(\mathbf{k}+\mathbf{K})v(\mathbf{k})}{\omega - E(\mathbf{k}+\mathbf{K}) - E(-\mathbf{k}) + i0^+} \right) \quad (\text{S9})$$

$$\chi_{22}^0(\mathbf{K}, \omega) = \frac{1}{V} \sum_{\mathbf{k}} \left( \frac{v(\mathbf{k} - \mathbf{K}) u^*(\mathbf{k}) v^*(\mathbf{k} - \mathbf{K}) u(\mathbf{k})}{\omega + E(\mathbf{k} - \mathbf{K}) + E(-\mathbf{k}) + i0^+} - \frac{u^*(\mathbf{k}) v(\mathbf{k} + \mathbf{K}) u(\mathbf{k}) v^*(\mathbf{k} + \mathbf{K})}{\omega - E(\mathbf{k} + \mathbf{K}) - E(-\mathbf{k}) + i0^+} \right) \quad (\text{S10})$$

$$\chi_{23}^0(\mathbf{K}, \omega) = \frac{1}{V} \sum_{\mathbf{k}} \left( \frac{u^*(\mathbf{k})u(\mathbf{k}-\mathbf{K})v^*(\mathbf{k}-\mathbf{K})u(\mathbf{k})}{\omega + E(\mathbf{k}-\mathbf{K}) + E(-\mathbf{k}) + i0^+} + \frac{u^*(\mathbf{k})v(\mathbf{k}+\mathbf{K})v^*(\mathbf{k}+\mathbf{K})v(\mathbf{k})}{\omega - E(\mathbf{k}+\mathbf{K}) - E(-\mathbf{k}) + i0^+} \right) \quad (\text{S11})$$

$$\chi_{24}^0(\mathbf{K}, \omega) = \frac{1}{V} \sum_{\mathbf{k}} \left( \frac{-v^*(\mathbf{k})v(\mathbf{k}-\mathbf{K})v^*(\mathbf{k}-\mathbf{K})u(\mathbf{k})}{\omega + E(\mathbf{k}-\mathbf{K}) + E(-\mathbf{k}) + i0^+} - \frac{u^*(\mathbf{k})v(\mathbf{k}+\mathbf{K})u^*(\mathbf{k})u(\mathbf{k}+\mathbf{K})}{\omega - E(\mathbf{k}+\mathbf{K}) - E(-\mathbf{k}) + i0^+} \right) \quad (\text{S12})$$

$$\begin{aligned} \chi_{31}^0(\mathbf{K}, \omega) = & \\ \frac{1}{V} \sum_{\mathbf{k}} \left( \frac{v^*(\mathbf{k})u(\mathbf{k}-\mathbf{K})u(\mathbf{k})u^*(\mathbf{k}-\mathbf{K})}{\omega + E(\mathbf{k}-\mathbf{K}) + E(-\mathbf{k}) + i0^+} + \frac{v(\mathbf{k}+\mathbf{K})v^*(\mathbf{k})u^*(\mathbf{k}+\mathbf{K})v(\mathbf{k})}{\omega - E(\mathbf{k}+\mathbf{K}) - E(-\mathbf{k}) + i0^+} \right) \end{aligned} \quad (\text{S13})$$

$$\begin{aligned} \chi_{32}^0(\mathbf{K}, \omega) = & \frac{1}{V} \sum_{\mathbf{k}} \left( \frac{v(\mathbf{k} - \mathbf{K}) u^*(\mathbf{k}) u(\mathbf{k}) u^*(\mathbf{k} - \mathbf{K})}{\omega + E(\mathbf{k} - \mathbf{K}) + E(-\mathbf{k}) + i0^+} + \frac{v(\mathbf{k} + \mathbf{K}) v^*(\mathbf{k}) u(\mathbf{k}) v^*(\mathbf{k} + \mathbf{K})}{\omega - E(\mathbf{k} + \mathbf{K}) - E(-\mathbf{k}) + i0^+} \right) \end{aligned} \quad (\text{S14})$$

$$\chi_{33}^0(\mathbf{K}, \omega) = \frac{1}{V} \sum \left( \frac{u^*(\mathbf{k})u(\mathbf{k}-\mathbf{K})u(\mathbf{k})u^*(\mathbf{k}-\mathbf{K})}{\omega + E(\mathbf{k}-\mathbf{K}) + E(-\mathbf{k}) + i0^+} - \frac{v(\mathbf{k}+\mathbf{K})v^*(\mathbf{k})v^*(\mathbf{k}+\mathbf{K})v(\mathbf{k})}{\omega - E(\mathbf{k}+\mathbf{K}) - E(-\mathbf{k}) + i0^+} \right) \quad (\text{S15})$$

$$\chi_{34}^0(\mathbf{K}, \omega) = \frac{1}{V} \sum_{\mathbf{k}} \left( \frac{-v^*(\mathbf{k})v(\mathbf{k}-\mathbf{K})u(\mathbf{k})u^*(\mathbf{k}-\mathbf{K})}{\omega + E(\mathbf{k}-\mathbf{K}) + E(-\mathbf{k}) + i0^+} + \frac{v(\mathbf{k}+\mathbf{K})v^*(\mathbf{k})u^*(\mathbf{k})u(\mathbf{k}+\mathbf{K})}{\omega - E(\mathbf{k}+\mathbf{K}) - E(-\mathbf{k}) + i0^+} \right) \quad (\text{S16})$$

$$\chi_{41}^0(\mathbf{K}, \omega) = \frac{1}{V} \sum_{\mathbf{k}} \left( \frac{-v^*(\mathbf{k})u(\mathbf{k}-\mathbf{K})v(\mathbf{k})v^*(\mathbf{k}-\mathbf{K})}{\omega + E(\mathbf{k}-\mathbf{K}) + E(-\mathbf{k}) + i0^+} - \frac{u(\mathbf{k})u^*(\mathbf{k}+\mathbf{K})u^*(\mathbf{k}+\mathbf{K})v(\mathbf{k})}{\omega - E(\mathbf{k}+\mathbf{K}) - E(-\mathbf{k}) + i0^+} \right) \quad (\text{S17})$$

$$\chi_{42}^0(\mathbf{K}, \omega) = \frac{1}{V} \sum_{\mathbf{k}} \left( \frac{-v(\mathbf{k} - \mathbf{K})u^*(\mathbf{k})v(\mathbf{k})v^*(\mathbf{k} - \mathbf{K})}{\omega + E(\mathbf{k} - \mathbf{K}) + E(-\mathbf{k}) + i0^+} - \frac{u(\mathbf{k})u^*(\mathbf{k} + \mathbf{K})u(\mathbf{k})v^*(\mathbf{k} + \mathbf{K})}{\omega - E(\mathbf{k} + \mathbf{K}) - E(-\mathbf{k}) + i0^+} \right) \quad (\text{S18})$$

$$\begin{aligned} \chi_{43}^0(\mathbf{K}, \omega) = \\ \frac{1}{V} \sum_{\mathbf{k}} \left( \frac{-u^*(\mathbf{k})u(\mathbf{k}-\mathbf{K})v(\mathbf{k})v^*(\mathbf{k}-\mathbf{K})}{\omega + E(\mathbf{k}-\mathbf{K}) + E(-\mathbf{k}) + i0^+} + \frac{u(\mathbf{k})u^*(\mathbf{k}+\mathbf{K})v^*(\mathbf{k}+\mathbf{K})v(\mathbf{k})}{\omega - E(\mathbf{k}+\mathbf{K}) - E(-\mathbf{k}) + i0^+} \right) \end{aligned} \quad (\text{S19})$$

$$\begin{aligned} \chi_{44}^0(\mathbf{K}, \omega) = \\ \frac{1}{V} \sum_{\mathbf{k}} \left( \frac{v^*(\mathbf{k})v(\mathbf{k}-\mathbf{K})v(\mathbf{k})v^*(\mathbf{k}-\mathbf{K})}{\omega + E(\mathbf{k}-\mathbf{K}) + E(-\mathbf{k}) + i0^+} - \frac{u(\mathbf{k})u^*(\mathbf{k}+\mathbf{K})u^*(\mathbf{k})u(\mathbf{k}+\mathbf{K})}{\omega - E(\mathbf{k}+\mathbf{K}) - E(-\mathbf{k}) + i0^+} \right) \end{aligned} \quad (\text{S20})$$

If we assume that  $u, v \in \mathbb{R}$ , then we have the following relations between the components:

$$\begin{aligned} \chi_{12}^0 &= \chi_{21}^0 = -\chi_{34}^0 = -\chi_{43}^0 \\ \chi_{13}^0 &= \chi_{31}^0 \\ \chi_{14}^0 &= \chi_{41}^0 \\ \chi_{23}^0 &= \chi_{32}^0 \\ \chi_{24}^0 &= \chi_{42}^0 \end{aligned} \quad (\text{S21})$$
